# Supplementary material for: Reference values for amino acids and acylcarnitines in peripheral blood in Quarter horses and American Miniature horses
Source: Springer Nature journal article supplement (doi:10.1186/s13028-015-0144-9), 2015-09-29
Supplement: MOESM1 [file 13028_2015_144_MOESM1_ESM.pdf]

**Additional file 1 (.txt). - Phenotypic characteristics of the horses of both breeds.** Includes phenotypical characteristics (breed, sex, age, weight, height) and the relationship between individual of the group.

| Horse ID | Breed | Sex | Age (Years) | Weight (Kg) | Height (Inches) | Relationship      |
|----------|-------|-----|-------------|-------------|-----------------|-------------------|
| 1        | AMH   | ♂   | 12.16       | 110.5       | 32.5            | ND                |
| 2        | AMH   | ♂   | 6           | 102         | 34              | ND                |
| 3        | AMH   | ♂   | 7.08        | 100         | 32              | ND                |
| 4        | AMH   | ♂   | 5           | 103         | 32.5            | ND                |
| 5        | AMH   | ♂   | 16.16       | 90          | 28              | ND                |
| 6        | AMH   | ♀   | 6           | 100         | 34              | ND                |
| 7        | AMH   | ♀   | 5           | 98          | 31              | ND                |
| 8        | AMH   | ♀   | 5           | 99          | 34.5            | ND                |
| 9        | AMH   | ♀   | 6.16        | 102         | 36              | ND                |
| 10       | AMH   | ♀   | 0.08        | 12          | 24.5            | Foal of #9 y #3   |
| 11       | AMH   | ♀   | 13.16       | 106         | 30              | ND                |
| 12       | AMH   | ♀   | 11.16       | 105         | 31              | ND                |
| 13       | AMH   | ♀   | 9.16        | 115         | 33.7            | ND                |
| 14       | AMH   | ♀   | 9.16        | 118         | 33              | Mother of #15     |
| 15       | AMH   | ♂   | 0.25        | 16          | 21.2            | Foal of 3# y #15  |
| 16       | AMH   | ♀   | 8           | 110         | 36              | ND                |
| 17       | AMH   | ♀   | 4.16        | 99          | 35.5            | ND                |
| 18       | AMH   | ♀   | 11.08       | 114         | 33.5            | ND                |
| 19       | AMH   | ♀   | 13.92       | 98          | 33              | Mother of #20     |
| 20       | AMH   | ♂   | 0.16        | 14          | 26              | Foal of #19 y #1  |
| 21       | AMH   | ♀   | 10.25       | 106         | 31.5            | ND                |
| 22       | AMH   | ♀   | 0.5         | 48          | 28.5            | ND                |
| 23       | AMH   | ♂   | 2           | 95          | 30              | ND                |
| 24       | AMH   | ♀   | 5.92        | 100         | 31.5            | ND                |
| 25       | AMH   | ♀   | 11.08       | 100         | 32.5            | ND                |
| 26       | AMH   | ♀   | 12.67       | 120         | 32.7            | ND                |
| 27       | AMH   | ♀   | 11          | 118         | 35              | ND                |
| 28       | AMH   | ♀   | 6.84        | 100         | 32.7            | ND                |
| 29       | AMH   | ♀   | 12.16       | 110         | 33.4            | ND                |
| 30       | AMH   | ♀   | 15          | 100         | 29              | ND                |
| 31       | AMH   | ♀   | 12          | 98          | 32              | ND                |
| 32       | AMH   | ♂   | 6           | 112         | 34              | ND                |
| 33       | AMH   | ♂   | 11.25       | 102         | 29              | ND                |
| 34       | AMH   | ♀   | 2.16        | 100         | 32              | ND                |
| 35       | AMH   | ♀   | 6           | 105         | 33              | Mother of #36 #43 |
| 36       | AMH   | ♂   | 0.16        | 45          | 26              | Foal of #35 y #2  |
| 37       | AMH   | ♀   | 7           | 105         | 35.5            | ND                |
| 38       | AMH   | ♀   | 6           | 104         | 35              | Mother of #39     |
| 39       | AMH   | ♀   | 0.5         | 49          | 30              | Foal of #38 y #42 |

|    |     |   |      |     |      |                   |
|----|-----|---|------|-----|------|-------------------|
| 40 | AMH | ♂ | 6    | 100 | 32   | ND                |
| 41 | AMH | ♀ | 6    | 103 | 35   | Mother of #42     |
| 42 | AMH | ♂ | 0.08 | 28  | 24   | Foal of #41 y #32 |
| 43 | AMH | ♀ | 2.33 | 101 | 32.5 | Foal of #35 y #2  |
| 44 | AMH | ♀ | 2.67 | 100 | 32.5 | Foal of #37 y #2  |
| 45 | AMH | ♂ | 3.08 | 105 | 36   | Foal of #37       |
| 46 | AMH | ♀ | 1    | 98  | 31.5 | ND                |
| 47 | AMH | ♂ | 0.67 | 85  | 28.5 | Foal of #37 y #2  |
| 48 | AMH | ♀ | 2    | 100 | 30.5 | ND                |
| 49 | AMH | ♀ | 5    | 110 | 33   | ND                |
| 50 | AMH | ♀ | 3    | 105 | 32.5 | ND                |
| 51 | QH  | ♀ | 2    | 300 | 64   | ND                |
| 52 | QH  | ♂ | 2    | 320 | 64   | ND                |
| 53 | QH  | ♂ | 5    | 425 | 64.5 | ND                |
| 54 | QH  | ♀ | 10   | 600 | 65   | ND                |
| 55 | QH  | ♀ | 5    | 400 | 64.5 | ND                |
| 56 | QH  | ♀ | 6    | 438 | 66   | ND                |
| 57 | QH  | ♀ | 6    | 433 | 65   | ND                |
| 58 | QH  | ♂ | 11   | 602 | 66   | ND                |
| 59 | QH  | ♂ | 3    | 450 | 64   | ND                |
| 60 | QH  | ♀ | 7    | 455 | 64   | ND                |
| 61 | QH  | ♀ | 3    | 410 | 64.3 | ND                |
| 62 | QH  | ♂ | 5    | 430 | 64.2 | ND                |
| 63 | QH  | ♀ | 15   | 598 | 66   | ND                |
| 64 | QH  | ♂ | 7    | 500 | 66.1 | ND                |
| 65 | QH  | ♀ | 7    | 515 | 65   | ND                |
| 66 | QH  | ♂ | 1    | 250 | 65   | ND                |
| 67 | QH  | ♂ | 1    | 280 | 64.2 | ND                |
| 68 | QH  | ♂ | 11   | 595 | 66   | ND                |
| 69 | QH  | ♂ | 5    | 490 | 66   | ND                |
| 70 | QH  | ♀ | 5    | 480 | 64.3 | ND                |
| 71 | QH  | ♀ | 7    | 500 | 64.3 | ND                |
| 72 | QH  | ♂ | 5    | 480 | 64   | ND                |
| 73 | QH  | ♀ | 5    | 440 | 64.5 | ND                |
| 74 | QH  | ♀ | 7    | 520 | 65   | ND                |
| 75 | QH  | ♀ | 8    | 525 | 65   | ND                |
| 76 | QH  | ♀ | 5    | 445 | 66   | ND                |
| 77 | QH  | ♀ | 10   | 602 | 64.2 | ND                |
| 78 | QH  | ♂ | 1    | 400 | 64.3 | ND                |
| 79 | QH  | ♂ | 10   | 600 | 64.2 | ND                |
| 80 | QH  | ♀ | 5    | 450 | 66   | ND                |
| 81 | QH  | ♀ | 8    | 500 | 64   | ND                |
| 82 | QH  | ♀ | 10   | 603 | 64.2 | ND                |
| 83 | QH  | ♀ | 8    | 520 | 64.2 | ND                |

|     |    |   |    |     |      |    |
|-----|----|---|----|-----|------|----|
| 84  | QH | ♀ | 6  | 522 | 64.5 | ND |
| 85  | QH | ♀ | 5  | 500 | 64.2 | ND |
| 86  | QH | ♀ | 7  | 532 | 65   | ND |
| 87  | QH | ♂ | 12 | 602 | 65   | ND |
| 88  | QH | ♂ | 12 | 598 | 64.5 | ND |
| 89  | QH | ♂ | 8  | 550 | 65   | ND |
| 90  | QH | ♀ | 9  | 552 | 65   | ND |
| 91  | QH | ♂ | 12 | 600 | 66   | ND |
| 92  | QH | ♀ | 6  | 489 | 65.2 | ND |
| 93  | QH | ♂ | 16 | 600 | 65.3 | ND |
| 94  | QH | ♀ | 7  | 492 | 64   | ND |
| 95  | QH | ♂ | 14 | 595 | 64.3 | ND |
| 96  | QH | ♀ | 5  | 500 | 64   | ND |
| 97  | QH | ♂ | 1  | 400 | 64.5 | ND |
| 98  | QH | ♂ | 9  | 480 | 64   | ND |
| 99  | QH | ♂ | 11 | 593 | 64.3 | ND |
| 100 | QH | ♂ | 9  | 460 | 66   | ND |

\*ND: Not Determined
