# Supplementary material for: Reference values for amino acids and acylcarnitines in peripheral blood in Quarter horses and American Miniature horses
Source: Springer Nature journal article supplement (doi:10.1186/s13028-015-0144-9), 2015-09-29
Supplement: MOESM2 [file 13028_2015_144_MOESM2_ESM.pdf]

**Additional file 2 (.txt) - Statistic data.** Includes mean, standard deviation, minimum and maximum ranges for the metabolites analyzed.

| Metabolite   | Group | Mean (μmol/L) | SD (μmol/L) | Min (μmol/L) | Max (μmol/L) |
|--------------|-------|---------------|-------------|--------------|--------------|
| <b>C0</b>    | QH♀   | 0.006040      | 0.002453    | 0.002221     | 0.011975     |
|              | QH♂   | 0.000736      | 0.000350    | 0.000183     | 0.001398     |
|              | AMH♀  | 0.000228      | 0.000084    | 0.000094     | 0.000458     |
|              | AMH♂  | 0.000025      | 0.000007    | 0.000014     | 0.000038     |
| <b>C2</b>    | QH♀   | 0.000009      | 0.000003    | 0.000004     | 0.000018     |
|              | QH♂   | 0.000006      | 0.000002    | 0.000002     | 0.000011     |
|              | AMH♀  | 0.000014      | 0.000004    | 0.000006     | 0.000024     |
|              | AMH♂  | 0.000007      | 0.000004    | 0.000001     | 0.000015     |
| <b>C4</b>    | QH♀   | 0.000012      | 0.000004    | 0.000007     | 0.000021     |
|              | QH♂   | 0.000004      | 0.000002    | 0.000002     | 0.000010     |
|              | AMH♀  | 0.000005      | 0.000002    | 0.000001     | 0.000009     |
|              | AMH♂  | 0.000009      | 0.000003    | 0.000003     | 0.000017     |
| <b>C6</b>    | QH♀   | 0.000011      | 0.000007    | 0.000001     | 0.000035     |
|              | QH♂   | 0.000009      | 0.000005    | 0.000001     | 0.000020     |
|              | AMH♀  | 0.000005      | 0.000003    | 0.000001     | 0.000012     |
|              | AMH♂  | 0.000012      | 0.000006    | 0.000003     | 0.000027     |
| <b>C6DC</b>  | QH♀   | 0.000341      | 0.000159    | 0.000088     | 0.000634     |
|              | QH♂   | 0.000013      | 0.000007    | 0.000004     | 0.000032     |
|              | AMH♀  | 0.000009      | 0.000004    | 0.000004     | 0.000019     |
|              | AMH♂  | 0.000343      | 0.000125    | 0.000137     | 0.000634     |
| <b>C8</b>    | QH♀   | 0.000284      | 0.000140    | 0.000075     | 0.000554     |
|              | QH♂   | 0.000087      | 0.000042    | 0.000024     | 0.000167     |
|              | AMH♀  | 0.000004      | 0.000002    | 0.000001     | 0.000007     |
|              | AMH♂  | 0.000357      | 0.000144    | 0.000096     | 0.000598     |
| <b>C8.1</b>  | QH♀   | 0.000006      | 0.000003    | 0.000001     | 0.000012     |
|              | QH♂   | 0.000133      | 0.000062    | 0.000047     | 0.000290     |
|              | AMH♀  | 0.104557      | 0.025796    | 0.074176     | 0.190331     |
|              | AMH♂  | 0.149917      | 0.075461    | 0.016506     | 0.263229     |
| <b>C10</b>   | QH♀   | 0.040340      | 0.011135    | 0.020627     | 0.059315     |
|              | QH♂   | 0.306743      | 0.067739    | 0.213052     | 0.479254     |
|              | AMH♀  | 0.089688      | 0.016380    | 0.057581     | 0.111680     |
|              | AMH♂  | 0.013089      | 0.003442    | 0.007298     | 0.019741     |
| <b>C10.1</b> | QH♀   | 0.042918      | 0.030059    | 0.019971     | 0.130973     |
|              | QH♂   | 0.033107      | 0.005782    | 0.018234     | 0.044697     |

|              |      |          |          |          |          |
|--------------|------|----------|----------|----------|----------|
|              | AMH♀ | 0.090337 | 0.017838 | 0.062151 | 0.123062 |
|              | AMH♂ | 0.000491 | 0.000102 | 0.000379 | 0.000760 |
| <b>C10.2</b> | QH♀  | 0.064015 | 0.013170 | 0.036973 | 0.093552 |
|              | QH♂  | 0.056089 | 0.014095 | 0.030098 | 0.083976 |
|              | AMH♀ | 0.005512 | 0.001919 | 0.002853 | 0.009918 |
|              | AMH♂ | 0.001009 | 0.000358 | 0.000517 | 0.001758 |
| <b>C12</b>   | QH♀  | 0.000271 | 0.000066 | 0.000136 | 0.000385 |
|              | QH♂  | 0.000026 | 0.000009 | 0.000014 | 0.000046 |
|              | AMH♀ | 0.000011 | 0.000003 | 0.000006 | 0.000018 |
|              | AMH♂ | 0.000012 | 0.000007 | 0.000004 | 0.000033 |
| <b>C12.1</b> | QH♀  | 0.000015 | 0.000004 | 0.000009 | 0.000022 |
|              | QH♂  | 0.000007 | 0.000004 | 0.000002 | 0.000021 |
|              | AMH♀ | 0.000014 | 0.000004 | 0.000008 | 0.000022 |
|              | AMH♂ | 0.000003 | 0.000001 | 0.000001 | 0.000006 |
| <b>C14</b>   | QH♀  | 0.000009 | 0.000005 | 0.000002 | 0.000020 |
|              | QH♂  | 0.000010 | 0.000002 | 0.000005 | 0.000014 |
|              | AMH♀ | 0.000019 | 0.000009 | 0.000006 | 0.000036 |
|              | AMH♂ | 0.000013 | 0.000006 | 0.000006 | 0.000027 |
| <b>C14.1</b> | QH♀  | 0.000007 | 0.000004 | 0.000002 | 0.000017 |
|              | QH♂  | 0.000010 | 0.000004 | 0.000004 | 0.000017 |
|              | AMH♀ | 0.000581 | 0.000357 | 0.000216 | 0.001739 |
|              | AMH♂ | 0.000024 | 0.000017 | 0.000008 | 0.000080 |
| <b>C14.2</b> | QH♀  | 0.000009 | 0.000007 | 0.000003 | 0.000031 |
|              | QH♂  | 0.000421 | 0.000199 | 0.000216 | 0.000968 |
|              | AMH♀ | 0.000478 | 0.000269 | 0.000183 | 0.001331 |
|              | AMH♂ | 0.000070 | 0.000030 | 0.000038 | 0.000138 |
| <b>C14OH</b> | QH♀  | 0.000005 | 0.000002 | 0.000001 | 0.000009 |
|              | QH♂  | 0.000478 | 0.000139 | 0.000263 | 0.000714 |
|              | AMH♀ | 0.000008 | 0.000004 | 0.000003 | 0.000015 |
|              | AMH♂ | 0.000174 | 0.000051 | 0.000112 | 0.000297 |
| <b>C16</b>   | QH♀  | 0.130827 | 0.028228 | 0.089592 | 0.188688 |
|              | QH♂  | 0.078084 | 0.058058 | 0.014981 | 0.173920 |
|              | AMH♀ | 0.047324 | 0.009838 | 0.029232 | 0.065769 |
|              | AMH♂ | 0.258574 | 0.040672 | 0.190267 | 0.321432 |
| <b>C16.1</b> | QH♀  | 0.121654 | 0.018618 | 0.086782 | 0.161768 |
|              | QH♂  | 0.012659 | 0.002976 | 0.008158 | 0.018000 |
|              | AMH♀ | 0.062392 | 0.035445 | 0.017403 | 0.120282 |
|              | AMH♂ | 0.036471 | 0.005867 | 0.025746 | 0.043954 |
| <b>C16OH</b> | QH♀  | 0.114918 | 0.021103 | 0.063657 | 0.160373 |
|              | QH♂  | 0.000538 | 0.000107 | 0.000367 | 0.000720 |

|              |      |          |          |          |          |
|--------------|------|----------|----------|----------|----------|
|              | AMH♀ | 0.059865 | 0.009844 | 0.040304 | 0.081931 |
|              | AMH♂ | 0.067499 | 0.014194 | 0.041439 | 0.092391 |
| <b>C18</b>   | QH♀  | 0.006482 | 0.002846 | 0.001360 | 0.013241 |
|              | QH♂  | 0.000870 | 0.000444 | 0.000178 | 0.001833 |
|              | AMH♀ | 0.000248 | 0.000117 | 0.000076 | 0.000564 |
|              | AMH♂ | 0.000028 | 0.000008 | 0.000014 | 0.000044 |
| <b>C18.1</b> | QH♀  | 0.000011 | 0.000003 | 0.000006 | 0.000019 |
|              | QH♂  | 0.000008 | 0.000003 | 0.000002 | 0.000013 |
|              | AMH♀ | 0.000013 | 0.000003 | 0.000007 | 0.000022 |
|              | AMH♂ | 0.000006 | 0.000004 | 0.000002 | 0.000019 |
| <b>C18.2</b> | QH♀  | 0.000013 | 0.000004 | 0.000007 | 0.000020 |
|              | QH♂  | 0.000003 | 0.000002 | 0.000001 | 0.000008 |
|              | AMH♀ | 0.000007 | 0.000002 | 0.000004 | 0.000012 |
|              | AMH♂ | 0.000010 | 0.000004 | 0.000004 | 0.000018 |
| <b>C18OH</b> | QH♀  | 0.000012 | 0.000007 | 0.000002 | 0.000029 |
|              | QH♂  | 0.000011 | 0.000005 | 0.000004 | 0.000029 |
|              | AMH♀ | 0.000006 | 0.000003 | 0.000003 | 0.000014 |
|              | AMH♂ | 0.000011 | 0.000005 | 0.000004 | 0.000024 |
| <b>C5</b>    | QH♀  | 0.000372 | 0.000179 | 0.000064 | 0.000882 |
|              | QH♂  | 0.000016 | 0.000008 | 0.000002 | 0.000038 |
|              | AMH♀ | 0.000010 | 0.000004 | 0.000002 | 0.000021 |
|              | AMH♂ | 0.000408 | 0.000163 | 0.000053 | 0.000772 |
| <b>C5.1</b>  | QH♀  | 0.000320 | 0.000147 | 0.000079 | 0.000752 |
|              | QH♂  | 0.000071 | 0.000036 | 0.000027 | 0.000148 |
|              | AMH♀ | 0.000005 | 0.000003 | 0.000001 | 0.000013 |
|              | AMH♂ | 0.000416 | 0.000184 | 0.000106 | 0.000825 |
| <b>C3</b>    | QH♀  | 0.000007 | 0.000004 | 0.000002 | 0.000015 |
|              | QH♂  | 0.000150 | 0.000086 | 0.000027 | 0.000392 |
|              | AMH♀ | 0.115120 | 0.027690 | 0.071754 | 0.174346 |
|              | AMH♂ | 0.161366 | 0.090596 | 0.025345 | 0.297430 |
| <b>ALA</b>   | QH♀  | 0.041063 | 0.010714 | 0.024054 | 0.067104 |
|              | QH♂  | 0.268919 | 0.053714 | 0.197666 | 0.405829 |
|              | AMH♀ | 0.096991 | 0.025939 | 0.053938 | 0.148576 |
|              | AMH♂ | 0.012878 | 0.003449 | 0.006743 | 0.018941 |
| <b>ARG</b>   | QH♀  | 0.044570 | 0.031411 | 0.018166 | 0.116609 |
|              | QH♂  | 0.034292 | 0.006837 | 0.018915 | 0.047875 |
|              | AMH♀ | 0.087978 | 0.020717 | 0.048532 | 0.137679 |
|              | AMH♂ | 0.000525 | 0.000123 | 0.000376 | 0.000796 |
| <b>CIT</b>   | QH♀  | 0.069332 | 0.011422 | 0.052657 | 0.095034 |
|              | QH♂  | 0.057453 | 0.015546 | 0.035085 | 0.095515 |

|     |      |          |          |          |          |
|-----|------|----------|----------|----------|----------|
|     | AMH♀ | 0.005434 | 0.002031 | 0.002539 | 0.013836 |
|     | AMH♂ | 0.001012 | 0.000924 | 0.000429 | 0.006013 |
| GLY | QH♀  | 0.000280 | 0.000055 | 0.000182 | 0.000395 |
|     | QH♂  | 0.000026 | 0.000008 | 0.000014 | 0.000045 |
|     | AMH♀ | 0.000011 | 0.000003 | 0.000006 | 0.000020 |
|     | AMH♂ | 0.000008 | 0.000003 | 0.000003 | 0.000018 |
| LEU | QH♀  | 0.000015 | 0.000003 | 0.000009 | 0.000022 |
|     | QH♂  | 0.000007 | 0.000004 | 0.000002 | 0.000018 |
|     | AMH♀ | 0.000013 | 0.000004 | 0.000008 | 0.000024 |
|     | AMH♂ | 0.000004 | 0.000001 | 0.000001 | 0.000008 |
| MET | QH♀  | 0.000008 | 0.000005 | 0.000003 | 0.000027 |
|     | QH♂  | 0.000012 | 0.000007 | 0.000003 | 0.000043 |
|     | AMH♀ | 0.000016 | 0.000008 | 0.000005 | 0.000035 |
|     | AMH♂ | 0.000014 | 0.000009 | 0.000004 | 0.000062 |
| ORN | QH♀  | 0.000006 | 0.000003 | 0.000002 | 0.000020 |
|     | QH♂  | 0.000011 | 0.000005 | 0.000003 | 0.000024 |
|     | AMH♀ | 0.000462 | 0.000182 | 0.000120 | 0.000923 |
|     | AMH♂ | 0.000021 | 0.000011 | 0.000004 | 0.000056 |
| PHE | QH♀  | 0.000010 | 0.000005 | 0.000004 | 0.000019 |
|     | QH♂  | 0.000380 | 0.000127 | 0.000084 | 0.000597 |
|     | AMH♀ | 0.000379 | 0.000155 | 0.000133 | 0.000648 |
|     | AMH♂ | 0.000068 | 0.000025 | 0.000024 | 0.000113 |
| PRO | QH♀  | 0.000005 | 0.000003 | 0.000001 | 0.000015 |
|     | QH♂  | 0.000451 | 0.000134 | 0.000204 | 0.000712 |
|     | AMH♀ | 0.000009 | 0.000004 | 0.000002 | 0.000016 |
|     | AMH♂ | 0.000196 | 0.000069 | 0.000101 | 0.000355 |
| SA  | QH♀  | 0.133316 | 0.027553 | 0.083821 | 0.187016 |
|     | QH♂  | 0.065122 | 0.066885 | 0.009555 | 0.222408 |
|     | AMH♀ | 0.043898 | 0.012195 | 0.029522 | 0.083136 |
|     | AMH♂ | 0.257401 | 0.061412 | 0.109081 | 0.434769 |
| TYR | QH♀  | 0.129348 | 0.027941 | 0.086569 | 0.193429 |
|     | QH♂  | 0.011724 | 0.002194 | 0.008285 | 0.017895 |
|     | AMH♀ | 0.067717 | 0.026758 | 0.013833 | 0.115849 |
|     | AMH♂ | 0.036910 | 0.005984 | 0.020724 | 0.046335 |
| VAL | QH♀  | 0.107510 | 0.020855 | 0.065728 | 0.163217 |
|     | QH♂  | 0.000571 | 0.000109 | 0.000367 | 0.000849 |
|     | AMH♀ | 0.063535 | 0.007542 | 0.052006 | 0.092359 |
|     | AMH♂ | 0.074089 | 0.016539 | 0.047189 | 0.104254 |
